# Supplementary material for: Multi-functional interface modulation through thiol functionalized covalent organic frameworks for efficient and durable perovskite solar cells
Source: Royal Society of Chemistry journal article supplement (doi:10.1039/d4ta05155f), 2024-01-01
Supplement: d4ta05155f1.pdf [file d4ta05155f1.pdf]

## Supporting Information

### **Multi-Functional interface modulation through thiol functionalized covalent organic frameworks for efficient and durable perovskite solar cells**

Bo Yu, Kai Wang, Yapeng Sun, Huangzhong Yu\*

*School of Physics and Optoelectronics, South China University of Technology, Guangzhou  
510640, Guangdong, China.*

\* Corresponding author: hzhyu@scut.edu.cn (Huangzhong Yu).

## Experimental section

### Materials

The indium tin oxide (ITO,  $15 \Omega \text{ sq}^{-1}$ ) was provided via Wuhu Jinghui Electronic Technology Co., Ltd); Chlorobenzene (CB, 99.9%), N, N-dimethylformamide (DMF, 99.8%), and isopropanol (IPA, 99.5%) were from Sigma-Aldrich; Dimethyl sulfoxide (DMSO, 99.9%) was from Alfa Aesar; Perovskite precursor reagents, Phenyl-C61-butyric acid methyl ester (PCBM, 99%) and [2-(3,6-Dimethoxy-9H-carbazol-9-yl)ethyl]phosphonic Acid (MeO-2PACz, 99%) were purchased Xi'an Polymer Light Technology Corp., China; Bathocuproine (BCP, >98%), 2,5-diaminobenzene-1,4-dithiol dihydrochloride (99.9%) and 1,3,5-triformylphloroglucinol (99.9%) were obtained from Aladdin Reagent Co., Ltd; All the commercial materials were from commercial channels and used without further treatment.

### Preparation of thiol-functionalized COFs

Thiol-functionalized COFs (SH-COF) were synthesized by two kinds of precursors based on the Schiff-base reactions. 1,3,5-triformylphloroglucinol (TFP) (63 mg, 0.3 mmol) and 2,5-diaminobenzene-1,4-dithiol dihydrochloride (DBD) (110 mg, 0.45 mmol) were precisely weighted and added to a 10 mL Schlenk glass reaction tube. Then, 1.5 mL of mesitylene, 1.5 mL of dioxane and 0.5 mL of 3 M acetic acid was transferred into the container. The mixture was ultrasonicated for 30 min in order to uniformly dispersed. After three freeze-thaw degassing treatments in liquid  $\text{N}_2$  bath, the tube was heated at  $120 \text{ }^\circ\text{C}$  for 72 h. After cooling to room temperature, the separated precipitate was washed for 5 times with tetrahydrofuran, and dried in vacuum at  $180 \text{ }^\circ\text{C}$  for 24 h to obtain the dark red product. Subsequently, SH-COF powder was dispersed in IPA solution and stirred overnight to obtain relevant suspension for subsequent experiments.

### Device fabrication

The pre-patterned indium tin oxide (ITO) substrates were sequentially ultrasonically washed with detergent, deionized water, acetone and isopropanol for 15 min. The processed substrates were further cleaned with  $\text{O}_3$ /ultraviolet treatments for

15 min and finally transferred to a N<sub>2</sub>-filled glovebox before used. For the hole-transporting layer, MeO-2PACz solution (0.5 mg ml<sup>-1</sup> in ethyl alcohol) was spin-coated on the ITO substrate at 3000 rpm for 30 s, and then annealed at 100 °C for 10 min. The Perovskite precursor solution (FA<sub>0.95</sub>Cs<sub>0.05</sub>PbI<sub>3</sub>) was obtained by mixing FAI, PbI<sub>2</sub>, and CsI in DMF: DMSO mixed solvent (volume ratio: 4 to 1). The perovskite films were deposited on the above substrates by a two-step spin-coating process, 2000 rpm for 10 s and 4000 rpm for 30s, respectively. 150 μL CB as anti-solvent was poured on the spinning film at 35 s and then annealed at 100 °C for 30 min. Then, PC<sub>61</sub>BM (20 mg mL<sup>-1</sup> in CB) and BCP (0.5 mg mL<sup>-1</sup> in IPA) solutions were spin-coated onto the substrates at 3000 rpm for 40 s and 6000 rpm for 30 s, respectively. Next, 30 μL of SH-COF suspension (0, 1, 2, 3 and 5 mg mL<sup>-1</sup> in IPA) was deposited on the above films at 4000 rpm for 30 s. Finally, a 90 nm Ag electrode was obtained by means of thermal evaporation under high-vacuum (less than 2.8 × 10<sup>-4</sup> Pa).

### **Characterization**

The X-ray diffraction (XRD) curves were measured on a Bruker Discovery D8 diffractometer with Cu-Kα radiation ( $\lambda=1.54 \text{ \AA}$ ) at 40 kV. Fourier transform infrared (FTIR) spectra were characterized on a Thermo Scientific Nicolet iS50 instrument. X-ray photoelectron spectroscopy (XPS) and ultraviolet photoelectron spectroscopy (UPS) were carried out on the Thermo Scientific Escalab 250Xi instrument equipped with Mg-Kα source. The morphological properties of the perovskite films were identified via a field emission scanning electron microscopy (SEM, Hitachi S4700). The atomic force microscope (AFM) was investigated on the Multimode 8 AFM from Bruker. UV-Vis absorption spectra of the perovskite films were obtained on an ocean optics spectrum testing system with DH-2000-BAL UV-VIS-NIR light source. Steady-state photoluminescence (PL) spectra were measured by performing a Laser405-1HS illuminant. Time-resolved PL (TRPL) measurements were performed using a FLS920 from Edinburgh Instruments Ltd./UK. The current density-voltage ( $J$ - $V$ ) measurements and space-charge-limited current (SCLC) performance were executed through a Keithley 2400 source meter equipped with a xenon lamp-based solar simulator (AM 1.5G, irradiance of 100 mW·cm<sup>-2</sup>). The external quantum efficiency (EQE) was

recorded with AC mode on an SRF50 system. The electrochemical impedance spectra (EIS) were measured using a Zennium-IM6 electrochemical workstation under dark conditions.

### **Theoretical calculation details**

We have used the first-principles Vienna Ab Initio Package (VASP) to complete all calculations. The exchange correlation functional is described by the Perdue-Burke-Ernzerhof (PBE) method in the generalized gradient approximation (GGA) with the plane wave cut-off energy of 450 eV. For the optimization process, the electron energy is self-consistent when it is converged to the accuracy of  $1 \times 10^{-5}$  eV, and the convergence criteria for atomic forces are set at less than 0.03 eV/Å. The Brillouin zone is divided by the number of K-point grids centered on the  $\Gamma$  point. While  $1 \times 2 \times 1$  grid of K-points is used for electronic states analysis. The DFT-D3 method of Grimme is enabled to describe the dispersion interactions. The differential charge density between SH-COF molecules and Ag is defined as  $\Delta \rho$ ,  $\Delta \rho = \rho_{AB} - \rho_A - \rho_B$ , where  $\rho_{AB}$  represents the structure charge density after interface optimization,  $\rho_A$  represented the charge density of SH-COF,  $\rho_B$  represented the charge density of Ag. The adsorption energy ( $E_{ads}$ ) of SH-COF molecules on the Ag surface is defined as  $E_{ads}$ ,  $E_{ads} = E_{A+B} - E_A - E_B$ , where  $E_{A+B}$ ,  $E_A$ ,  $E_B$  were the total energy of SH-COF molecules are adsorbed on the Ag surface, the energy of SH-COF molecules, the energy of the Ag film, respectively.

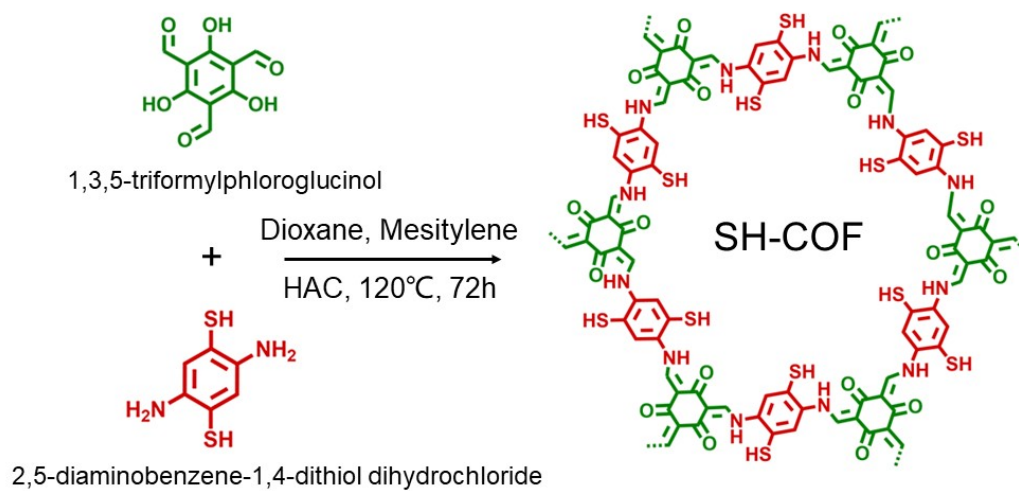

**Figure S1.** The synthesis scheme of SH-COF.

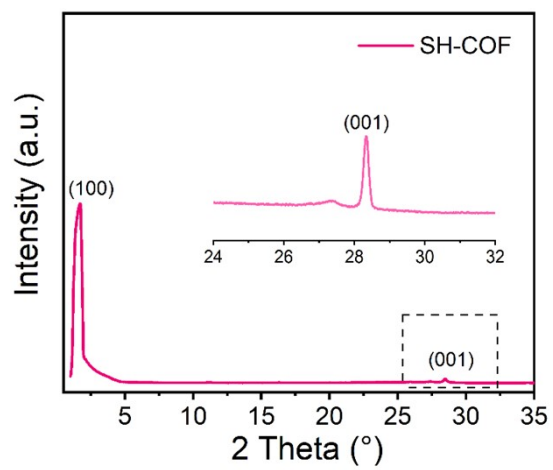

**Figure S2.** The XRD pattern of SH-COF.

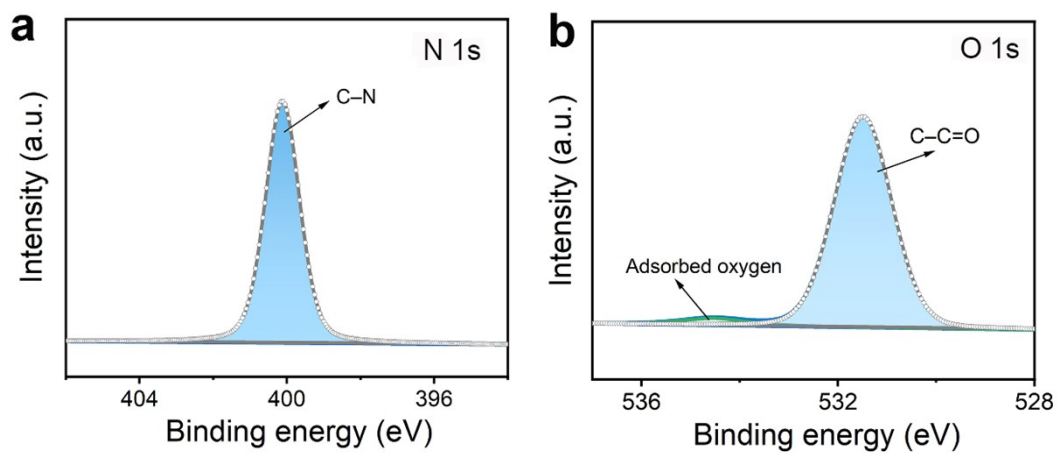

**Figure S3.** XPS pattern of **a)** N 1s and **b)** O 1s peaks of SH-COF.

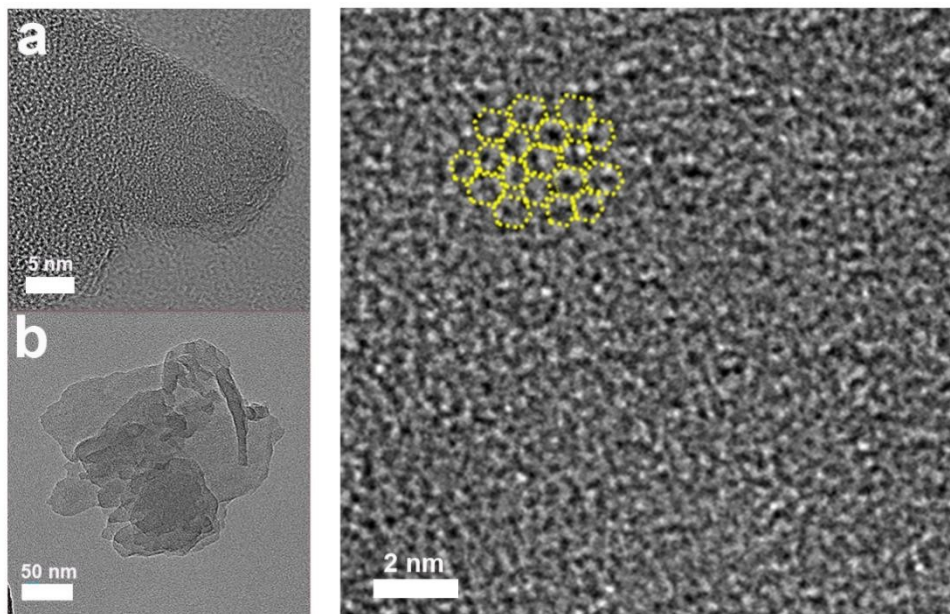

**Figure S4.** High-resolution transmission electron microscopy (TEM) image of SH-COF.



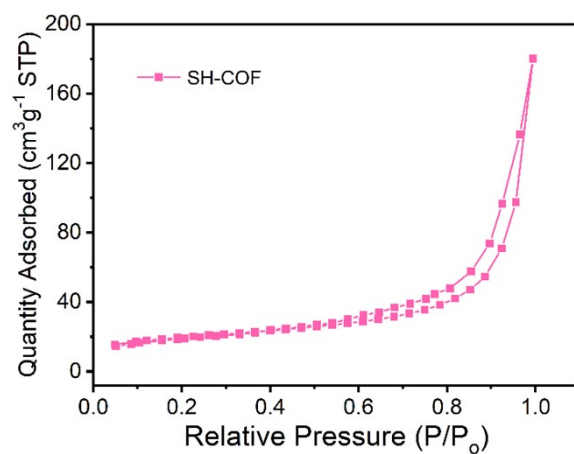

**Figure S5.** N<sub>2</sub> adsorption/desorption isotherms of SH-COF.

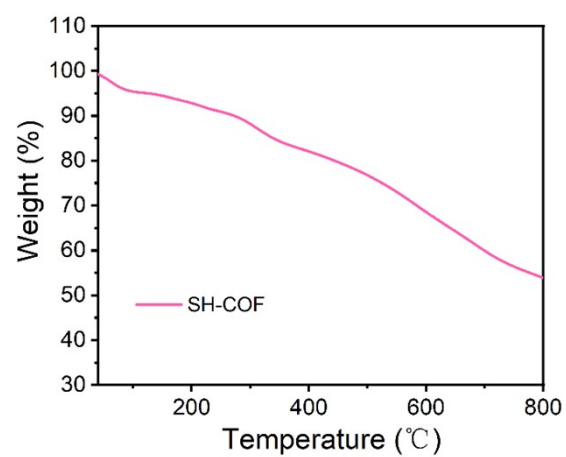

**Figure S6.** The weight and temperature dependence of SH-COF.

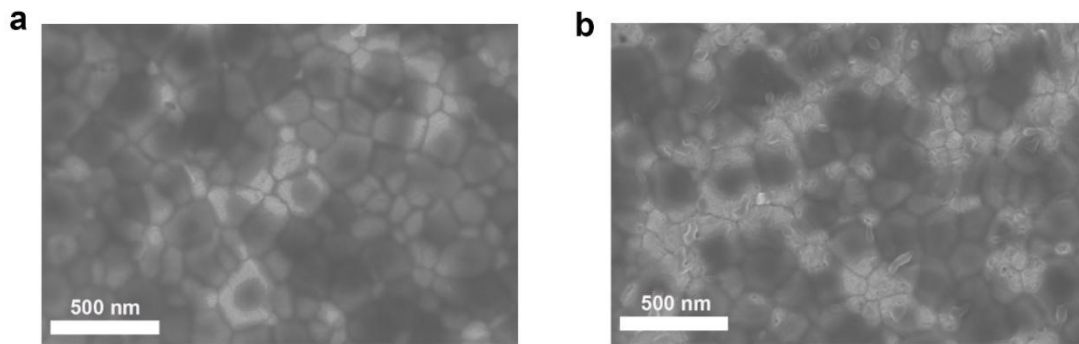

**Figure S7.** Top-view SEM images of **a)** perovskite/PCBM and **b)** perovskite/PCBM/SH-COF films.

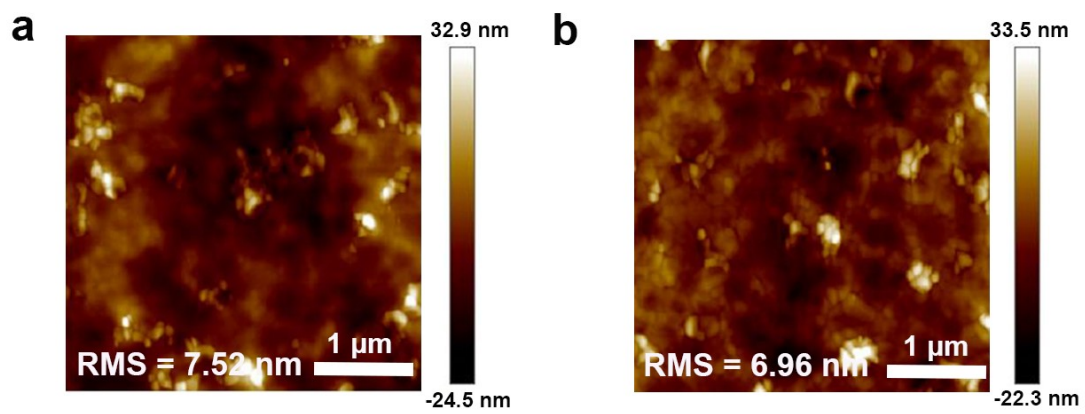

**Figure S8.** AFM images of **a)** perovskite/PCBM and **b)** perovskite/PCBM/SH-COF films.

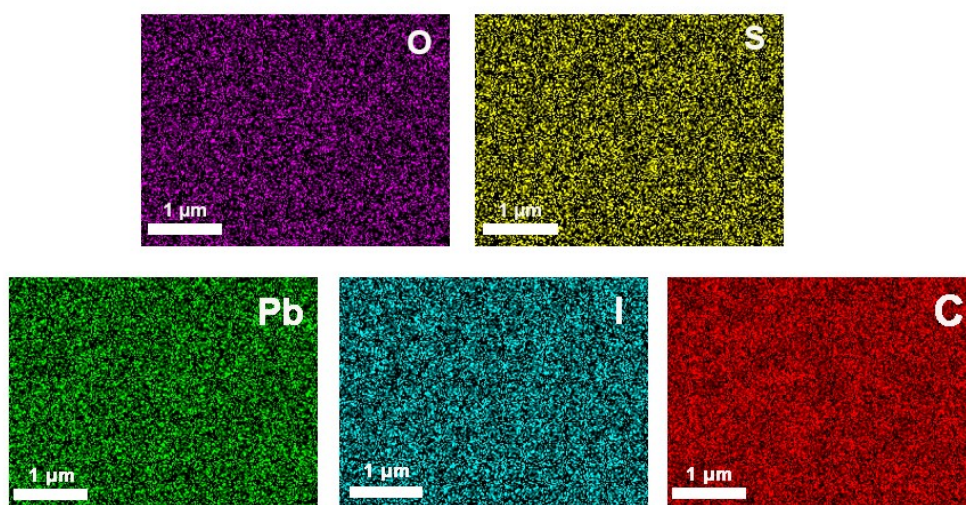

**Figure S9.** EDS mapping of C, Pb, I, S, O elements of the perovskite/PCBM/SH-COF film.

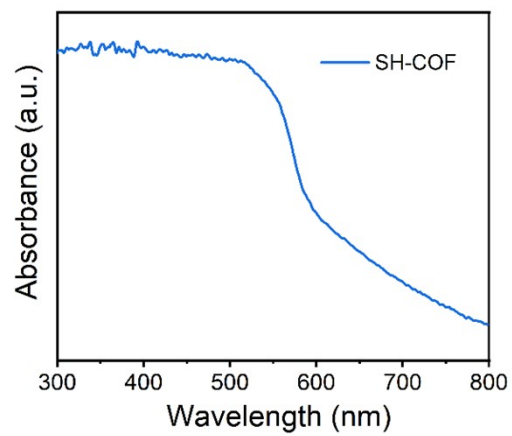

**Figure S10.** UV-vis diffuse reflectance spectrum of SH-COF.

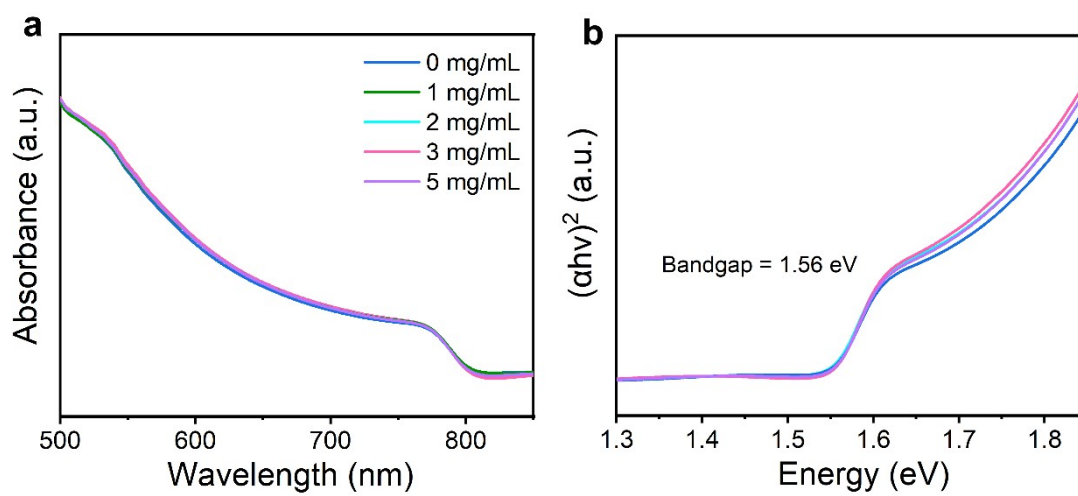

**Figure S11.** a) UV-vis spectra of perovskite/PCBM/SH-COF films with different concentrations of SH-COF, and b) the Tauc plot of the perovskite film.

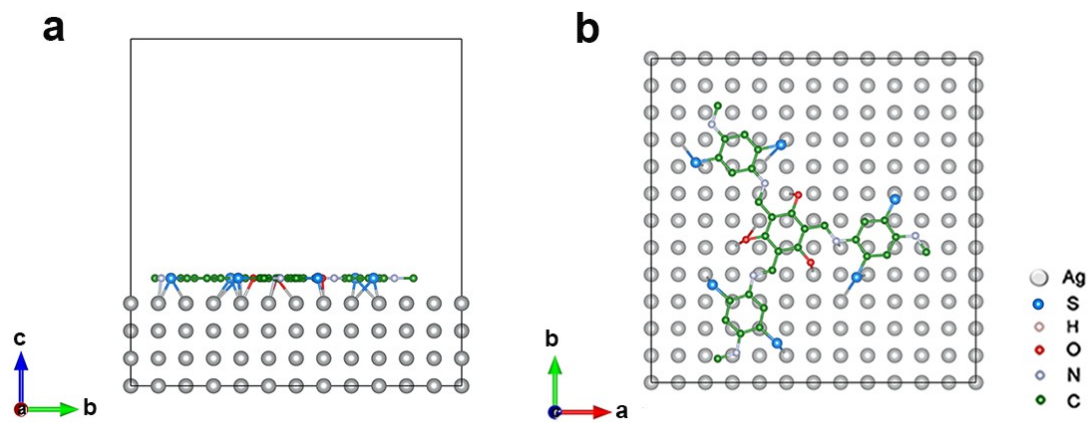

**Figure S12.** The theoretical model of SH-COF molecule and Ag before optimization: **a)** front view and **b)** top view.



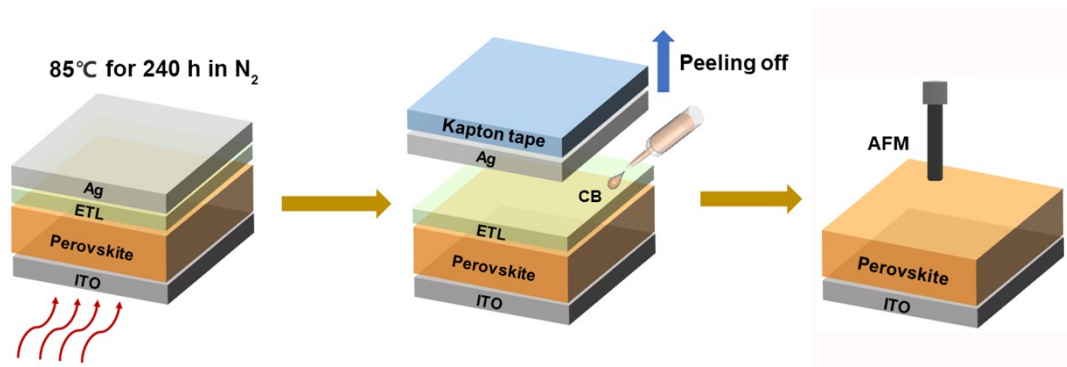

**Figure S13.** The preparation process of perovskite films from the aging devices for AFM characterizations, the corresponding device structure is ITO/perovskite/PCBM/BSP/SH-COF/Ag.

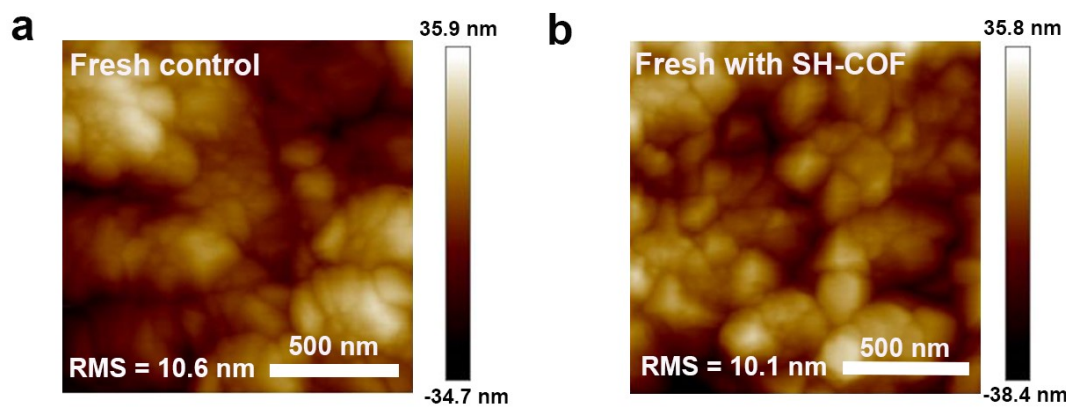

**Figure S14.** AFM images of perovskite films from the devices **d)** without and **e)** with SH-COF before thermal aging.

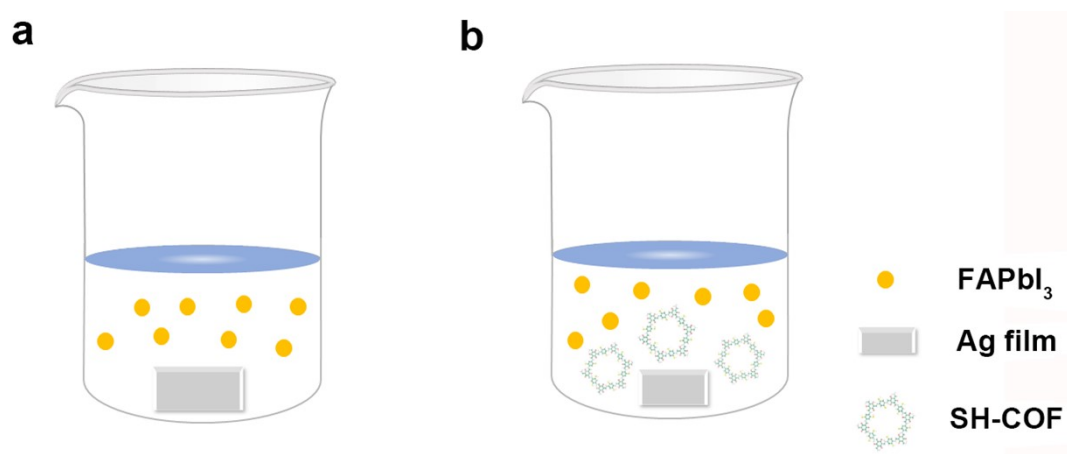

**Figure S15.** Schematic diagram of immersing experiments. The Ag/ITO films are immersed in FAPbI<sub>3</sub> dispersion (15 mg mL<sup>-1</sup> in isopropanol) without or with SH-COF (5.0 mg mL<sup>-1</sup>).

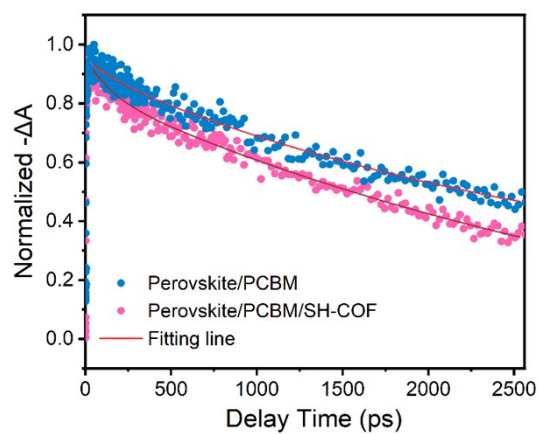

**Figure S16.** TA spectra as a function of delay time for perovskite/PCBM and perovskite/PCBM/SH-COF films.

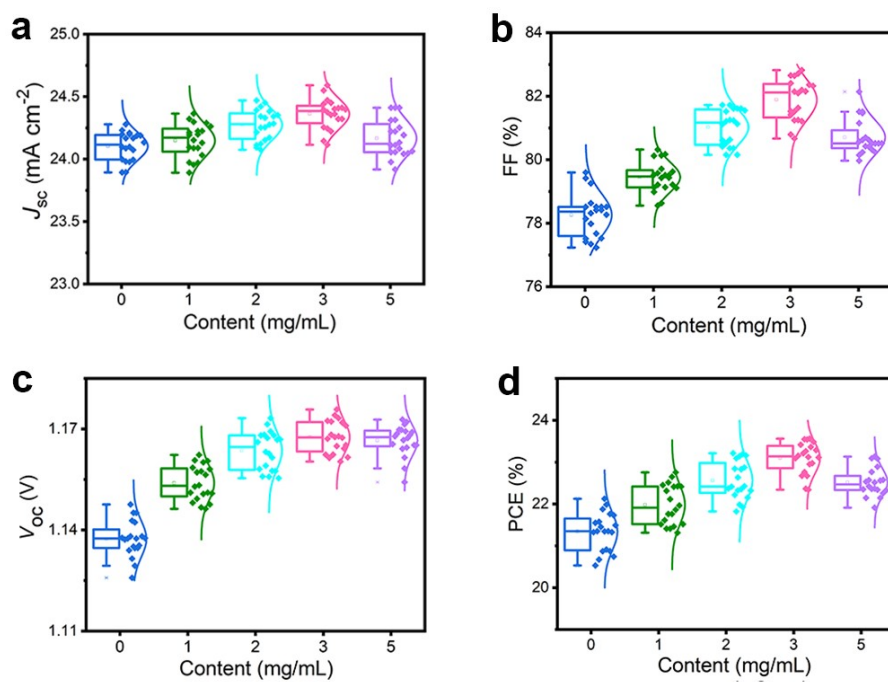

**Figure S17.** Statistical distribution of the devices with different concentrations of SH-COF of

**a)  $J_{sc}$ , b) FF, c)  $V_{oc}$ , and d) PCE.**

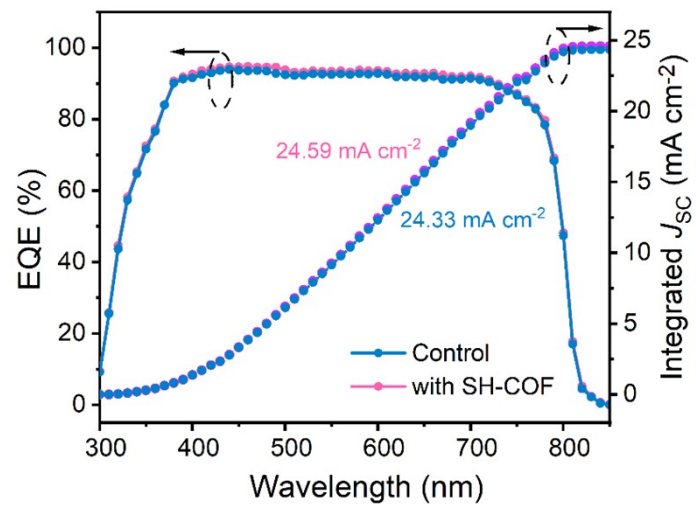

**Figure S18.** EQE curves of the control and SH-COF modified devices.

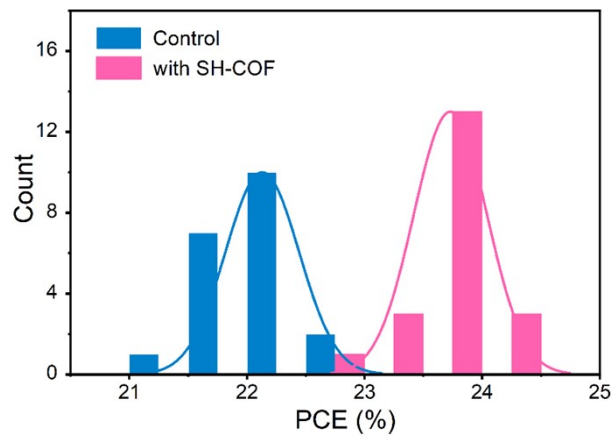

**Figure S19.** Statistics of PCE distribution of the devices with and without SH-COF layer (20 devices).

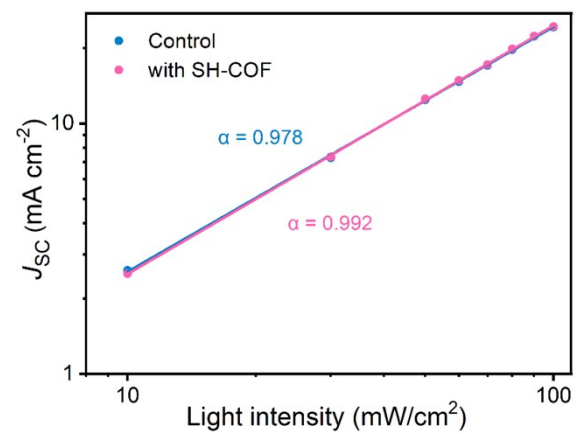

**Figure S20.**  $J_{sc}$  versus light intensity plots of the control and SH-COF modified devices.



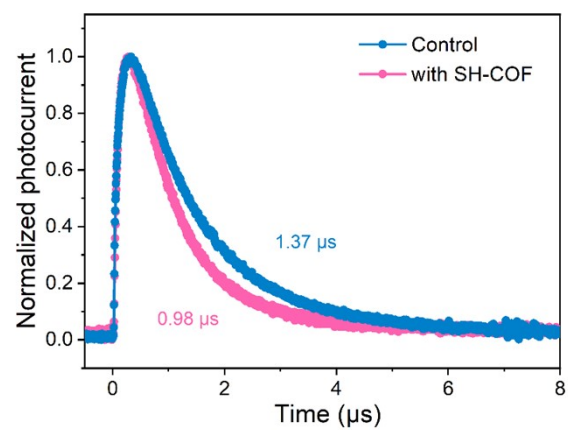

**Figure S21.** TPC curves of the control and SH-COF modified devices.

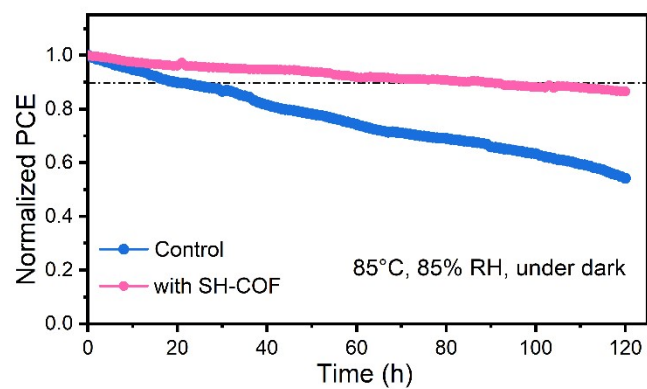

**Figure S22.** The long-term operational stability of the unencapsulated devices during 85°C and 85% RH aging.

**Table S1.** Summary of fitting parameters of time-resolved PL (TRPL) spectra.

| <b>Sample</b>          | $A_1$  | $\tau_1$<br><b>(ns)</b> | $A_2$ | $\tau_2$<br><b>(ns)</b> | $\tau_{ave}$<br><b>(ns)</b> |
|------------------------|--------|-------------------------|-------|-------------------------|-----------------------------|
| Perovskite             | 4634.5 | 68.94                   | 5235  | 5.59                    | 63.59                       |
| Perovskite/SH-COF      | 2116.1 | 26.73                   | 7982  | 3.74                    | 18.79                       |
| Perovskite/PCBM        | 2850.7 | 19.01                   | 6931  | 3.51                    | 14.21                       |
| Perovskite/PCBM/SH-COF | 942.1  | 18.03                   | 7970  | 2.32                    | 9.84                        |

The average carrier lifetime ( $\tau_{ave}$ ) is obtained by the following formula:  $\tau_{ave} = (A_1\tau_1 + A_2\tau_2)/(A_1 + A_2)$ , where  $A_1$  and  $A_2$  are the fitting amplitudes.

**Table S2.** The average  $J$ - $V$  performance of the devices with different concentrations of SH-COF.

(The values are obtained from 20 devices)

| <b>SH-COF<br/>(mg mL<sup>-1</sup>)</b> | <b><math>J_{sc}</math><br/>(mA cm<sup>-2</sup>)</b> | <b><math>V_{oc}</math><br/>(V)</b> | <b>FF<br/>(%)</b> | <b>PCE<br/>(%)</b> |
|----------------------------------------|-----------------------------------------------------|------------------------------------|-------------------|--------------------|
| 0                                      | 24.10±0.11                                          | 1.14±0.005                         | 78.25±0.66        | 21.34±0.43         |
| 1                                      | 24.15±0.13                                          | 1.15±0.005                         | 79.45±0.47        | 21.98±0.46         |
| 2                                      | 24.27±0.12                                          | 1.16±0.006                         | 81.03±0.55        | 22.56±0.44         |
| 3                                      | 24.36±0.12                                          | 1.17±0.004                         | 81.89±0.64        | 23.10±0.36         |
| 5                                      | 24.17±0.14                                          | 1.16±0.004                         | 80.71±0.54        | 22.52±0.32         |

**Table S3.** Solar cell performance parameters of the champion devices with and without SH-COF.

| <b>Sample</b> | <b><math>J_{sc}</math><br/>(mA cm<sup>-2</sup>)</b> | <b><math>V_{oc}</math><br/>(V)</b> | <b>FF<br/>(%)</b> | <b>PCE<br/>(%)</b> |
|---------------|-----------------------------------------------------|------------------------------------|-------------------|--------------------|
| Control       | 24.61                                               | 1.134                              | 79.73             | 22.25              |
| Control       | 24.79                                               | 1.142                              | 80.15             | 22.69              |
| with SH-COF   | 24.98                                               | 1.172                              | 82.14             | 24.05              |
| with SH-COF   | 25.02                                               | 1.173                              | 82.18             | 24.12              |

**Table S4.** Comparison of PCE and thermal stability of PSCs with different barrier materials.

| Device structure                                                                                                                                               | Barrier                       | PCE                         | Thermal stability test                  | % of PCE is maintained | Year                 |
|----------------------------------------------------------------------------------------------------------------------------------------------------------------|-------------------------------|-----------------------------|-----------------------------------------|------------------------|----------------------|
| FTO/PEDOT:PSS/MAPbI <sub>3</sub> /PCBM/AZO/SnO <sub>x</sub> /Ag                                                                                                | AZO/SnO <sub>x</sub>          | 12.8%                       | Dark, 60°C in N <sub>2</sub> , 1032 h   | 100%                   | 2017 <sup>[1]</sup>  |
| FTO/NiMgLiO/MAPbI <sub>3</sub> /PCBM/CeO <sub>x</sub> /Ag                                                                                                      | CeO <sub>x</sub>              | 18.69%                      | MPP condition in air, 200 h             | 91%                    | 2018 <sup>[2]</sup>  |
| FTO/NiMgLiO/FAMACsPbI <sub>3</sub> /PCBM/BCP/Bi/Ag                                                                                                             | Bi                            | 18.67%                      | Dark, 85°C in N <sub>2</sub> , 500 h    | 85.2%                  | 2019 <sup>[3]</sup>  |
| ITO/NiO <sub>x</sub> /FA <sub>0.85</sub> MA <sub>0.15</sub> Pb(I <sub>0.75</sub> Br <sub>0.25</sub> ) <sub>3</sub> /PCBM-C <sub>3</sub> N <sub>4</sub> /BCP/Ag | C <sub>3</sub> N <sub>4</sub> | 15.6% (36 cm <sup>2</sup> ) | Dark, 85°C in N <sub>2</sub> , 1000 h   | 95%                    | 2019 <sup>[4]</sup>  |
| ITO/P3CT/MAPbI <sub>3</sub> /PCBM/C <sub>60</sub> /TPBi/BTA/Cu                                                                                                 | BTA                           | 19.56%                      | Dark, 85 °C in N <sub>2</sub> , 1100 h  | 90.7%                  | 2020 <sup>[5]</sup>  |
| ITO/PTAA/CsFAMAPbI <sub>3</sub> /PCBM/CIL/Au                                                                                                                   | CIL                           | 20%                         | MPP condition in N <sub>2</sub> , 250 h | 80%                    | 2021 <sup>[6]</sup>  |
| ITO/NiO <sub>x</sub> /CsFAMAPbI <sub>3</sub> /PCBM/BCP:TTTS/Ag                                                                                                 | TTTS                          | 22.59%                      | Dark, 85°C in N <sub>2</sub> , 1500 h   | 93%                    | 2022 <sup>[7]</sup>  |
| ITO/PTAA/MAPbI <sub>3</sub> /PCBM/OXD-7/Ag                                                                                                                     | OXD-7                         | 21.83%                      | Dark, 85°C in N <sub>2</sub> , 1080 h   | 80%                    | 2023 <sup>[8]</sup>  |
| ITO/PTAA/FA <sub>0.95</sub> Cs <sub>0.05</sub> PbI <sub>3</sub> /C <sub>60</sub> /ALD-SnO <sub>2</sub> /amp-ZrN <sub>x</sub> /Cu                               | amp-ZrN <sub>x</sub>          | 23.1%                       | Dark, 85°C in N <sub>2</sub> , 1100 h   | 90%                    | 2023 <sup>[9]</sup>  |
| FTO/MeO-2PACz/RbCsMAFAPb(I <sub>0.95</sub> Br <sub>0.05</sub> ) <sub>3</sub> /PCBM/YbO <sub>x</sub> /Cu                                                        | YbO <sub>x</sub>              | 25.2%                       | Dark, 85°C in N <sub>2</sub> , 500 h    | 98%                    | 2024 <sup>[10]</sup> |
| ITO/MeO-2PACz/FA <sub>0.95</sub> Cs <sub>0.05</sub> PbI <sub>3</sub> /PCBM/BCP/SH-COF/Ag                                                                       | SH-COF                        | 24.12%                      | Dark, 85°C in N <sub>2</sub> , 1200 h   | 93.3%                  | This work            |

**Table S5.** Solar cell performance parameters of the champion devices with and without SH-COF for the area of 1.0 cm<sup>2</sup>.

| <b>Sample</b> | <b><i>J</i><sub>sc</sub><br/>(mA cm<sup>-2</sup>)</b> | <b><i>V</i><sub>oc</sub><br/>(V)</b> | <b>FF<br/>(%)</b> | <b>PCE<br/>(%)</b> |
|---------------|-------------------------------------------------------|--------------------------------------|-------------------|--------------------|
| Control       | 23.83                                                 | 1.11                                 | 75.95             | 20.09              |
| with SH-COF   | 24.12                                                 | 1.15                                 | 77.98             | 21.63              |

**Table S6.** EIS fitting parameters of the control and SH-COF modified devices.

| <b>Sample</b> | <b><math>R_s</math> (Ohm)</b> | <b><math>R_{rec}</math> (Ohm)</b> | <b><math>C_{rec}</math> (F)</b> |
|---------------|-------------------------------|-----------------------------------|---------------------------------|
| Control       | 147.6                         | 12368                             | $3.45 \times 10^{-8}$           |
| with SH-COF   | 137.1                         | 25958                             | $2.43 \times 10^{-8}$           |



## References

1. K.O. Brinkmann, J. Zhao, N. Pourdavoud, T. Becker, T. Hu, S. Olthof, K. Meerholz, L. Hoffmann, T. Gahlmann, R. Heiderhoff, M. F. Oszajca, N. A. Luechinger, D. Rogalla, Y. Chen, B. Cheng, T Riedl, *Nat. Commun.* 2017, **8**, 13938.
2. R. Fang, S. Wu, W. Chen, Z. Liu, S. Zhang, R. Chen, Y. Yue, L. Deng, Y. Cheng, L. Han, W. Chen, *ACS Nano*, 2018, **12**, 2403–2414.
3. S. Wu, R. Chen, S. Zhang, B. Babu, Y. Yue, H. Zhu, Z. Yang, C. Chen, W. Chen, Y. Huang, S. Fang, T. Liu, L. Han, W. Chen, *Nat. Commun.* 2019, **1**, 1161.
4. E. Bi, W. Tang, H. Chen, Y. Wang, J. Barbaud, T. Wu, W. Kong, P. Tu, H. Zhu, X. Zeng, J. He, S. Kan, X. Yang, M. Grätzel, L. Han, *Joule* 2019, **3**, 2748–2760.
5. X. Li, S. Fu, W. Zhang, S. Ke, W. Song, J. Fang, *Sci. Adv.* 2020, **51**, eabd1580
6. J. Wang, J. Li, Y. Zhou, C. Yu, Y. Hua, Y. Yu, R. Li, X. Lin, R. Chen, H. Wu, H. Xia, H.-L. Wang, *J. Am. Chem. Soc.* 2021, **20**, 7759-7768.
7. J. Yang, Q. Cao, T. Wang, B. Yang, X. Pu, Y. Zhang, H. Chen, I. Tojiboyev, Y. Li, L. Etgar, X. Li, A. Hagfeldt, *Energy Environ. Sci.* 2022, **5**, 2154-2163.
8. N. Liu, J. Xiong, Z. He, C. Yuan, J. Dai, Y. Zhang, C. Zhou, X. Zhang, L. Li, D. Wang, Z. Zhang, Y. Huang, Q. Dai, J. Zhang *Adv. Energy Mater.* 2023, **13**, 2300025.
9. M. Xiao, G. Yuan, Z. Lu, J. Xia, D. Li, Y. Chen, Y. Zhang, F. Pei, C. Chen, Y. Bai, T. Song, J. Dou, Y. Li, Y. Chen, Z. Xu, X. Yang, Z. Liu, X. Liu, C. Zhu, Q. Chen *Adv. Mater.* 2023, **35**, 2301684.
10. Q. Li, L. Zhao, C. Hou, Y. You, J. Shyue, D. Wang, X. Li, Q. Zhao, Q. Gong, Z. Lu, Henry J. Snaith, H. Yan, T. Huang, M. Yu, Q. Li, L. Zhao, C. Hou, Y. You, J. Shyue, D. Wang, X. Li, Q. Zhao, Q. Gong, Z. Lu, H.J. Snaith, R. Zhu, *Nature* 2024, **625**, 516–522.
